# Supplementary material for: Comprehensive evaluations of diurnal NO 2 measurements during DISCOVER-AQ 2011: Effects of resolution dependent representation of NO x emissions
Source: Copernicus journal article supplement (doi:10.5194/acp-2020-1193), 2021-01-06
Supplement: Supplementary file 1 [file acp-2020-1193-supplement.zip]

Archive with 2 entries (2 files):
- Supplement tables for Comprehensive evaluations of diurnal NO2 measurements during DISCOVER-AQ 2011 Effects of resolution dependent representation of NOx emissions.pdf
- Supplement figures for Comprehensive evaluations of diurnal NO2 measurements during DISCOVER-AQ 2011 Effects of resolution dependent representation of NOx emissions.pdf
